# Supplementary material
Source: Springer Nature journal article supplement (https://www.springerprofessional.de/resource/supplementary/13638_2013_630_MOESM10_ESM.pdf/11898770)

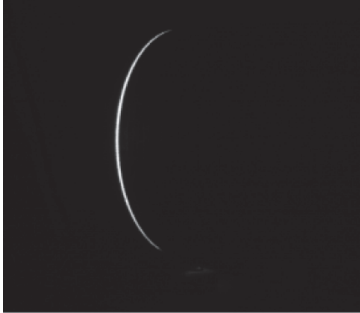

**(a) Laser stripe from camera 1**

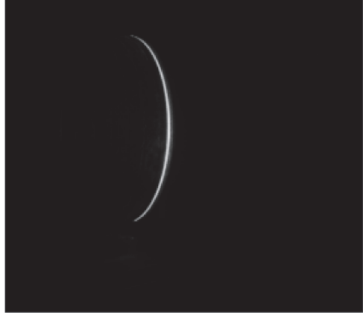

**(b) Laser stripe from camera 2**

Supplement: MOESM10 [file 11898770]
